# Supplementary material
Source: Research Square preprint supplement (doi:10.21203/rs.3.rs-9429149/v1)
Supplement: Supplementary file 1 [file 0f78c1e5354e1a59b6f241f4.docx]

**Table 1. Weighted Descriptive Statistics for Study Variables (N = 116,826)**

Characteristics Variable Category Percentage

Postpartum depression No 93.66

Yes 6.34

Intimate Partner Violence (IPV) No 99.62

Yes 0.38

**Resources**

Maternal Education High School 27.35

Some colleges 26.99

Bachelor’s degree 26.71

Graduate Degree 18.94

Household Income $0−$16,000 14.80

$16,000−$24,000 11.11

$24,000−$32,000 8.50

$32,000−$48,000 10.04

$48,000-$60,000 8.50

$60 and more 47.53

Marital status Married 69.83

Unmarried 30.17

**Stressors**

Medicaid Birth Coverage No 77.90

Yes 22.10

WIC participation during Preg. No 28.29

Yes 71.71

Pre-Birth Depression Diagnosis No 86.52

Yes 13.48

Pre-Birth Anxiety Diagnosis No 86.29

Yes 13.71

Infant Birth Defect No 0.57

Yes 99.43

Respondents' data from PRAM 2016-2022.

Proportions are weighted using survey weights; all variables are categorical.

**Table 1.(Continuation) Weighted Descriptive Statistics for Study Variables (N = 116,826)**

Characteristics Variable Category Percentage

**Stressors**

Physical Health Conditions (0-8) 0 82.1

1 13.31

2 2.80

3 0.52

4 0.17

5 0.30

6 0.09

7 0.31

8 0.34

**Demographic Characteristics**

Maternal Age Adolescent 2.44

Prime age 76.05

Advanced age 21.51

Maternal race White 73.93

Black 11.56

Other 14.51

Hispanic/Ethnicity No 85.98

Yes 14.02

Parity 0 39.35

1 33.83

2 16.15

3 to 5 9.07

6 or more 0.98

Respondents' data from PRAM 2016-2022.

**Table 2. Odds Ratios from Logistic Regression Models Predicting PDS**

Characteristics Model 1 Model 2 Model 3

Intimate Partner Violence

No (Ref)

Yes 5.08*** 2.17***

**Resources**

Maternal Education

High School (Ref)

Some colleges 1.16*** 1.16***

Bachelor’s degree 0.94 0.94

Graduate Degree 0.92 0.92

Household Income

$0−$16,000 (Ref)

$16,000−$24,000 0.89* 0.90

$24,000−$32,000 0.85* 0.86*

$32,000−$48,000 0.86* 0.87*

$48,000−$60,000 0.88* 0.89

$60 and more 0.72*** 0.73***

Marital status

Married (Ref)

Unmarried 1.20*** 1.20***

**Stressors**

Medicaid Birth Coverage

No (Ref)

Yes 1.01 1.01

WIC participation during pregnancy.

No (Ref)

Yes 0.95 0.95

Pre-Birth Depression Diagnosis

No (Ref)

Yes 5.28*** 5.25***

Pre-Birth Anxiety Diagnosis

No (Ref)

Yes 1.50*** 1.50***

Respondents' data from PRAM 2016-2022.

* p < 0.05, ** p < 0.01, *** p < 0.001.

Mode 1 (IPV only), Model 2 (Controls only), and Model 3 (Full).

**Table 2. (Continuation) Odds Ratios from Logistic Regression Models Predicting PDS**

Characteristics Model 1 Model 2 Model 3

Infant Birth Defect

No (Ref)

Yes 0.62** 0.62**

**Stressors**

Physical Health Conditions (0-8)

0 (Ref)

1 1.09 1.09

2 0.83* 0.83*

3 0.56** 0.56**

4 0.84 0.63

5 0.21*** 0.21***

6 1.00 1.01

7 0.32*** 0.32***

8 0.11*** 0.11***

**Demographic Characteristics**

Maternal Age

Adolescent (Ref)

Prime age 0.82* 0.83*

Advanced age 0.72*** 0.72***

Maternal race

White (Ref)

Black 1.06 1.06

Other 1.02 1.01

Hispanic/Ethnicity

No (Ref)

Yes 0.80** 0.80**

Parity

0 (Ref)

1 1.03 1.03

2 1.00 1.00

3 to 5 1.18** 1.18**

6 or more 0.86 0.85

Respondents' data from PRAM 2016-2022.

* p < 0.05, ** p < 0.01, *** p < 0.001.

Mode 1 (IPV only), Model 2 (Controls only), and Model 3 (Full Model).
